# Supplementary material for: Mechanically strong, self‐healing and pH‐responsive lignocellulose nanofibril‐based hydrogels towards drug delivery applications
Source: Research Square preprint supplement (doi:10.21203/rs.3.rs-3141505/v1), 2023-07-31
Supplement: Supplementary file 1 [file 492e2c91002e2fe112cc250e.docx]

**Associated content**

Supporting Information

The Supporting Information is available free of charge on the ACS Publications website at DOI: Includes TEM images and average diameter of CLCNF (Fig. S1); The swelling ratio of PVA/ B hydrogel and in vitro drug release profiles of TH from PVA /B hydrogel (Fig. S2); In vitro drug release profiles of TH in the initial 6 h (Fig. S3); Plot of ln (Mt/M∞) versus ln t, plots of ln (1–Mt/M∞) versus t, plots of Mt/M∞ versus t1/2, plots of Mt/M∞ versus t0.2 or the release of TH from PVA/CLCNF/B hydrogel in different release conditions (pH = 3.0, 5.0 and 7.4) (Fig. S4); Plot of ln (Mt/M∞) versus lnt, plots of ln (1–Mt/M∞) versus t, plots of Mt/M∞ versus t1/2, plots of Mt/M∞ versus t0.2 or the release of TH from PVA/B hydrogel in different release conditions (pH = 3.0, 5.0 and 7.4) (Fig. S5).
